# Supplementary material for: Thaw-driven mass wasting couples slopes with downstream systems, and effects propagate through Arctic drainage networks
Source: Copernicus journal article supplement (doi:10.5194/tc-15-3059-2021), 2021-07-06
Supplement: Supplementary file 1 [file tc-15-3059-2021-supplement.zip]

Archive with 3 entries (3 files):
- Supplement.pdf
- tc-15-3059-2021-supplement-title-page.pdf
- VideoS3_tc-2020-218_25SEPT2020.gif
