# Supplementary material for: Thaw-driven mass wasting couples slopes with downstream systems, and effects propagate through Arctic drainage networks
Source: Copernicus journal article supplement (doi:10.5194/tc-15-3059-2021), 2021-07-06
Supplement: Supplementary file 1 [file tc-15-3059-2021-supplement.zip › Supplement.pdf]

## Methods S1-S3

### Method S1. Workflow for Willow River downstream accumulation of effects.

To quantify the landslide scar and debris tongue areas of slope thermokarst features (STKs) affecting streams in the Willow River catchment and the downstream accumulation of STK scar areas through the fluvial network as an index for sedimentary and geochemical impact (main text Sect. 2.5.), we used delineations of retrogressive thaw slump scar/debris areas from (Rudy and Kokelj, 2020), and some additional delineations of shallow and deep translational failures that were not included in their thaw slump focused dataset, hydrologic data (streams and lakes) from the 1:50,000 National Hydro Network (NHN) dataset (Natural Resources Canada, 2016), and RivEX 10.25 software (Hornby, 2017). Data were compiled in ArcMap 10.6 and projected in the Canada Lambert Conformal Conic (CLCC) projected coordinate system. The workflow is documented in the following steps:

- 1) Manually delineated the Willow River catchment in ArcMap 10.6, using topographic data from the 1:50,000 Canadian Digital Elevation Model (CDED) dataset (Natural Resources Canada, 2015). To aid the interpretation of the watershed boundary, NHN Primary Directed Network Linear Flow (PDNLF) and Waterbody Shapefiles (10MC002) were added to represent Willow River catchment streams and lakes, respectively.
- 2) Clipped PDNLF and Waterbody feature classes (10MC002) to the Willow River catchment delineation from step 1.
- 3) Manually adjusted the PDNLF features to accommodate a recent channel abandonment and alteration in the routing of stream flow in the lower part of the catchment (main text Sect. 2.5.). Note that “nid” is a unique identifier assigned to each occurrence and feature in the NHN dataset. Adjustments included:
  - a) Removed PDNLF polyline (nid: 186964fe0c0c425c82150c486f7cbb71).
  - b) Split PDNLF polyline (nid: a44c53c852f14ff29561a048435aca29).
  - c) Added PDNLF polylines and assigned nid's: a1, a2, and a3.
  - d) Reversed the direction of PDNLF polylines with the following nids:
    - i) 8e0462e45626485bb69e6a7932f30c32
    - ii) 9cb7a1ca015543a5ab825684402188b0
    - iii) 6897bbd8a58c468c8cd15caf0610f5c2
    - iv) D94bcd35f20d46f39d9f920b5e4e5365
    - v) 92b84230ed9a4f6e9a881a18effa8884
    - vi) f53ff86131864f3ea2adcfc8dd34b780
- 4) Constructed a topological network and ran 'Quality Control' tools using RivEX. Adjusted PDNLF polylines as necessary to ensure network continuity (i.e. consistent from- and to-nodes).
- 5) NHN PDNLF features represent the primary or (main route) of a stream. However, the PDNLF features are segmented in sections of braided channels that result in pseudo-nodes. To remove pseudo-nodes in sections of

braided channels, a pseudo-node free network was generated using the 'Create Network Free of Pseudo Nodes' tool in RivEX.

- 6) Generated points at the intersections of streams and lakes and split the streams at the intersection points using a search radius of 5m.
- 7) Using the pseudo-node free network from steps 5 and 6, constructed a topological network, using RivEx, and ran 'Quality Control' tools (except monotonic trends). During the construction of the topological network, RivEX assigned each PDNLF polyline (segment) a unique ID (RivID).
- 8) Added a field (RivID) to the STK scar and debris shapefiles, expanded on from Rudy and Kokelj (2020), with the field type assigned as 'short integer'.
- 9) Assessed STK effects to stream and lake features, using delineations of STK scar and debris areas derived from 2018 Landsat imagery. STK features were interpreted to affect streams or lakes based on direct contact with the hydrological feature or based on the direction of down-slope flow indicated by topographic data (i.e. CDED). PDNLF segments affected by STK were recorded by assigning the value of the 'RivID' field, from the PDNLF segment to the corresponding STK polygon. Special considerations included:
  - a) Where STK(s) affected a lake, the RivID that corresponded with the hydrological/stream segment, located within the lake and at the lake outflow, was assigned to the STK polygon.
  - b) In cases where STK affected multiple stream segments, the RivID from the most upstream segment was assigned to the STK polygon. Some exceptions included:
    - i) Where STK affected both a main-stem and a tributary the RivID from the stream segment with the largest contact length, with the STK polygon, was assigned to the STK polygon.
    - ii) Where STK affected multiple headwater streams, the RivID from the stream segment with the largest contact length, with the STK polygon, was assigned to the STK polygon.
- 10) To ensure the consistency of areal estimates, landslide scar and debris tongue areas were computed using the same projected coordinate system used in Rudy and Kokelj (2020).
- 11) Using ArcMap's 'Summary Statistics' tool, a summary table was generated for the STK scar area shapefile, where the areas of all disturbed features were summed for each RivID value.
- 12) Repeated step 9 for the STK debris area shapefile.
- 13) Joined the summary tables, from steps 9 and 10 to the stream network based on the RivID field.
- 14) Using RivEX, assigned Strahler Order to stream segments and performed upstream accumulations for both the scar and debris areas. For the abandoned channel, accumulation values were manually re-set to 0.
- 15) Using the 'Feature to Point' tool in ArcMap, generated points for each stream segment affected by STK.
- 16) Scar and debris areas were summarized by Strahler Order (excluding hydrological/stream segments within lakes.)

## **Method S2. Workflow for broad-scale downstream accumulation of slope thermokarst effects.**

To quantify the number of hydrologic features (streams, lakes, and coastlines) affected by landslides or mass-wasting features, referred to here as slope thermokarst features (STKs) and to propagate the downstream effects of STK (main text Sect. 2.5), within Arctic drainage from permafrost terrain of northwestern Canada, we used an inventory of hydrologic features affected by STK (Kokoszka and Kokelj, 2021), hydrologic data (streams, lakes, and coastlines) from the 1:50,000 National Hydro Network (NHN) dataset (Natural Resources Canada, 2016), and RivEX 10.25 Software (Hornby, 2017). Data were compiled in ArcMap 10.6 and projected in the Canada Lambert Conformal Conic (CLCC) projected coordinate system. Due to the significant amount of hydrologic data required to propagate STK effects throughout the entire study basin, geoprocessing was completed based on the Water Survey of Canada sub-sub-drainage areas (NHN Work Unit) for a total of 68 Work Units which comprise the study area. A complete list of NHN Work Units is available from Kokoszka and Kokelj, 2021. Because the fluvial network was connected across NHN Work Units, accumulation analyses were first conducted for Work Units located in the headwaters of the study basin. Accumulation analyses were then conducted within downstream NHN Work Units to ensure the propagation of STK effects throughout the entire study basin. The workflow involved the following steps:

- 1) For a specified Work Unit, NHN Primary Directed Network Linear Flow (PDNLF), Waterbody, and Littoral feature classes were imported to ArcMap to represent streams, lakes, and coastlines, respectively.
- 2) Removed features from the Waterbody feature class that were attributed as watercourses or intermittent.
- 85 3) Modifications to hydrologic data were made for the specified NHN Work Units:
  - a) NHN Work Unit 10TB002: Removed a littoral segment that extended beyond the coastline into the Arctic Ocean (nid = 4bcd3316c65c449a99f307803d0bddb3).
  - b) NHN Work Unit 10MD002: Clipped hydrologic data to the reduced extent of the Work Unit delineation (Kokoszka and Kokelj, 2021).
  - 90 c) NHN Work unit 10MC002: Re-routed the Mackenzie River to propagate STK effects through the eastern portion of the Mackenzie Delta as opposed to the central region of the Mackenzie Delta by adding a PDNLF polyline (nid = 10mc002ADD01) and removing a PDNLF polyline (nid = 874e0d518ce34245a367869ddcbadeab).
- 4) Joined the attribute tables from the PDNLF feature class and STKI\_Stream feature class (Kokoszka and Kokelj, 95 2021) based on the 'nid' fields.
- 5) Added an attribute field (ValDirect) to the PDNLF feature class with the field type assigned as 'short integer'.
- 6) Selected PDNLF features where the 'STK' field was equal to 1 (directly affected by STK) and from the selected PDNLF features, attributed the 'ValDirect' field with a value of 1.
- 7) Constructed a topological network and ran 'Quality Control' tools using RivEX. Error logs were generated by 100 RivEX and were inspected for quality control. For this project, the error logs generated by RivEX included:

- a) Small polylines are composed of two vertices: Small polylines (< 1m) in length. Small polylines do not affect the integrity of the topological network. As such, for this project, small polylines were not adjusted during the quality control process.
- b) Polyline spikes: A digitization error where a single vertex is out of place that creates an acute angle along the length of the polyline. Spikes do not affect the integrity of the topological network but can increase the length of a polyline segment. For this project, polyline spikes were not adjusted because the increase in polyline length was deemed negligible compared to the overall length of polylines within the study basin.
- 8) Computed the upstream accumulation of direct STK affects, within the NHN Work Unit. In RivEX, selected 'attribute network' -> 'accumulate attribute in network' -> 'Run Tool' -> selected the variable to accumulate as 'ValDirect' -> specified the output field as 'AccDirect' -> selected 'OK'.
- 9) Identified indirectly affected PDNLF polylines (segments) (i.e. segments located upstream of directly affected segments). In ArcMap, started an edit session -> from the 'selection' tab, selected 'select by attribute' -> set selection method as 'create new selection' -> from the PDNLF layer, selected features where the 'AccDirect' field was > 0 -> selected 'OK' -> attributed the selected features 'STK' field with a value of 2 (indirect).
- 10) Identified PDNLF segments that were directly and indirectly affected by STK. In ArcMap, started an edit session -> from the 'selection' tab, selected 'select by attribute' -> set the selection method as 'create new selection' -> from the PDNLF layer, selected features where the 'AccDirect' field was > 0 -> selected 'OK' -> started a new selection from the 'selection' tab by selecting 'select by attribute' -> set selection method as 'from the current selection' -> from the PDNLF layer, selected features where the 'STK' field was not 0 -> selected 'OK' -> attributed the selected features 'STK' field with a value of 3 (both).
- 11) Identified indirectly affected Waterbody features (i.e. located upstream of directly affected PDNLF segments). In ArcMap, started an edit session -> from the 'selection' tab, selected 'select by attribute' -> set the selection method as 'create new selection' -> from the PDNLF layer, selected features where the 'AccDirect' field was > 0, and the 'Pseudo' field was equal to 0 -> selected 'OK' -> started a new selection from the 'selection' tab by selecting 'select by location' -> set the selection method as 'select features from' -> set the target layer as the Waterbody layer -> set the source layer as the PDNLF layer and ensured the 'use selected features' radio button was checked -> set the selection method as 'contain the source layer' -> selected 'OK' -> attributed the selected features 'STK' field with a value of 2 (indirect).
- 12) Identified Waterbody features that were directly and indirectly affected by STK. In ArcMap, started an edit session -> from the 'selection' tab, selected 'select by attribute' -> set selection method as 'create new selection' -> from the PDNLF layer, selected features where the 'AccDirect' field was > 0, and the 'Pseudo' field was equal to 1 -> started a new selection from the 'selection' tab by selecting 'select by location' -> set the selection method as 'select features from' -> set the target layer as the Waterbody layer -> set the source layer as the PDNLF layer and ensured the 'use

selected features' radio button was checked -> set the selection method as 'contain the source layer' -> selected 'OK'  
-> attributed the selected features 'STK' field with a value of 3 (both).

- 13) To ensure the downstream propagation of STK effects was correctly attributed, both PDNLF and Waterbody features were visually inspected by assigning a distinct color scheme based on the STK field (STK = 0, 1, 2, 3).
- 14) In ArcCatalog, generated a new point feature class (AccSink) and added an attribute field (ValDirect) with the field type assigned as 'short integer'.
- 15) Locations, where stream and lake derived STK affects propagated to the coastline, were identified by visually inspecting the downstream path of PDNLF segments based on the 'STK' field's color scheme (i.e. PDNLF segments that were not color highlighted) and mapping AccSink points at the downstream end of PDNLF segments, that terminated at the coastline. To represent the number of upstream (accumulated) hydrologic features directly affected by STK at the coastline, the value of the 'AccDirect' field, from the PDNLF segment, was attributed to the 'AccDirect' field of the AccSink point.
- 16) Because PDNLF segments represent the main route of network flow, in some cases, streams affected by STK did not propagate to the main stem of the Mackenzie River (NHN Work Unit: 10LC000). In such cases, the corresponding value of the 'AccDirect' field was added to the AccSink point at the outlet of the Mackenzie River main stem. Similarly, values of the 'AccDirect' fields, for streams located near the outer reach of the Mackenzie Delta, were consolidated to the AccSink point located at the outlet of the Mackenzie River main stem.
- 17) Generated a 500m buffer (AccSinkBuffer) around the AccSink points.
- 18) Identified indirectly affected Littoral features (i.e. features located downstream of directly and indirectly affected PDNLF segments). In ArcMap, started an edit session -> from the 'selection' tab, selected 'select by location' -> set the selection method as 'select features from' -> set the target layer as the Littoral layer -> set the source layer as the AccSinkBuffer layer -> set the selection method as 'intersect the source layer' -> selected 'OK' -> started a new selection from the 'selection' tab by selecting 'select by attribute' -> set the selection method as 'select from current selection' -> from the Littoral layer, selected features where the 'STK' field was equal to 0 -> selected 'OK' -> attributed the selected features 'STK' field with a value of 2 (indirect).
- 19) Identified Littoral features that were directly and indirectly affected by STK. In ArcMap, started an edit session -> from the 'selection' tab, selected 'select by location' -> set the selection method as 'select features from' -> set the target layer as the Littoral layer -> set the source layer as the AccSinkBuffer layer -> set the selection method as 'intersect the source layer' -> selected 'OK' -> started a new selection from the 'selection' tab by selecting 'select by attribute' -> set selection method as 'select from current selection' -> from the Littoral layer, selected features where the 'STK' field was equal to 1 -> selected 'OK' -> attributed the selected features 'STK' field with a value of 3 (both).
- 20) Repeated steps 1 to 21 for each NHN Work Unit. Where STK affects propagated between NHN Work Units, before conducting the accumulation analysis, the value of the 'AccDirect' field, for the upstream PDNLF segment (i.e.

located in the upstream NHN Work Unit), was attributed to the 'AccDirect' field for the downstream PDNLF segment (i.e. located in the downstream NHN Work Unit).

- 21) For each NHN Work Unit, segments from the PDNLF feature class, where the 'STK' field was equal to 1 (i.e. directly affected by STK), were selected and exported as new feature classes. The feature classes were then merged to generate a downstream trace that represented the propagated and accumulated STK effects across the entire study basin.
- 22) The downstream trace was visually inspected to ensure continuity of STK effects between NHN Work Units.

### Method S3. RivEX Workflow to Assess Strahler Order

To derive the Strahler stream and lake orders within four study watersheds (Keele-Redstone, Peel, Amundsen Gulf, and Banks Island) of the Arctic drainage from permafrost terrain of northwestern Canada (main text Sect. 2.5), we used hydrologic data (streams and lakes) from the 1:50,000 National Hydro Network dataset (NHN) (Natural Resources Canada, 2016) and RivEX 10.25 Software (Hornby, 2017). Data were compiled in ArcMap 10.6. Steps in the workflow included:

- 1) In ArcMap, imported NHN Primary Directed Network Linear Flow (PDNLF), Waterbody, and NHN WorkUnit feature classes to represented streams, lakes, and hydrologic boundaries, respectively.
- 2) Generated watershed delineations by merging the following NHN Work Unit feature classes for each specified watershed:
  - a) Keele-Redstone: 10HA000 and 10HB000
  - b) Peel: 10MA000, 10MB000, and 10MC002
  - c) Amundsen Gulf: 10OA001, 10OA002, 10OB000, 10OC001, and 10OC002
  - d) Banks Island: 10TA001, 10TA002, 10TA003, 10TA004, 10TB001, and 10TB002
- 3) Modifications to hydrologic data were made for the specified NHN Work Units:
  - a) NHN Work Unit 10TB002: Removed a littoral feature that extended beyond the coastline into the Arctic Ocean (nid = 4bcd3316c65c449a99f307803d0bddb3).
  - b) NHN Work Unit 10MC002: Work Unit feature class was manually reduced to specify the drainage area from a specified segment of the Peel River (nid = f1d3cf54069c4e4f9f35ddef517e4b9d). The 10MC002 Work Unit area included PDNLF polylines within the Mackenzie Delta. Computing Strahler order for PDNLF polylines within the 10MC002 Work Unit would have required computing Strahler order for the entire Mackenzie River, which was not feasible given computational restraints.
- 4) Merged PDNLF and Waterbody feature classes for their respective watersheds (see step 2). The merged PDNLF and Waterbody feature classes from the Peel watershed were clipped to the reduced watershed delineation (see Step 3b).
- 5) Constructed a topological network for each watershed using the merged PDNLF feature classes (see Step 4) and ran 'Quality Control' tools, using RivEX. The quality control error logs included small polylines and spikes within the networks. However, the presence of small polylines and spikes did not affect the topology of the network and was disregarded in the quality control process.
- 6) Computed Strahler Order for PDNLF polylines by selecting 'Strahler' from the 'Network Attribution' tool in RivEX.
- 7) Performed a spatial join between PDNLF polylines (join features) and Waterbody polygons (target features) to determine lake order. The spatial join matched PDNLF polylines that were located within Waterbody features based on the maximum Strahler Order of the PDNLF polylines, using a one-to-one join operation.
- 8) Visually inspected the Strahler stream and lake order outputs for quality assurance.

Figures S1-S4

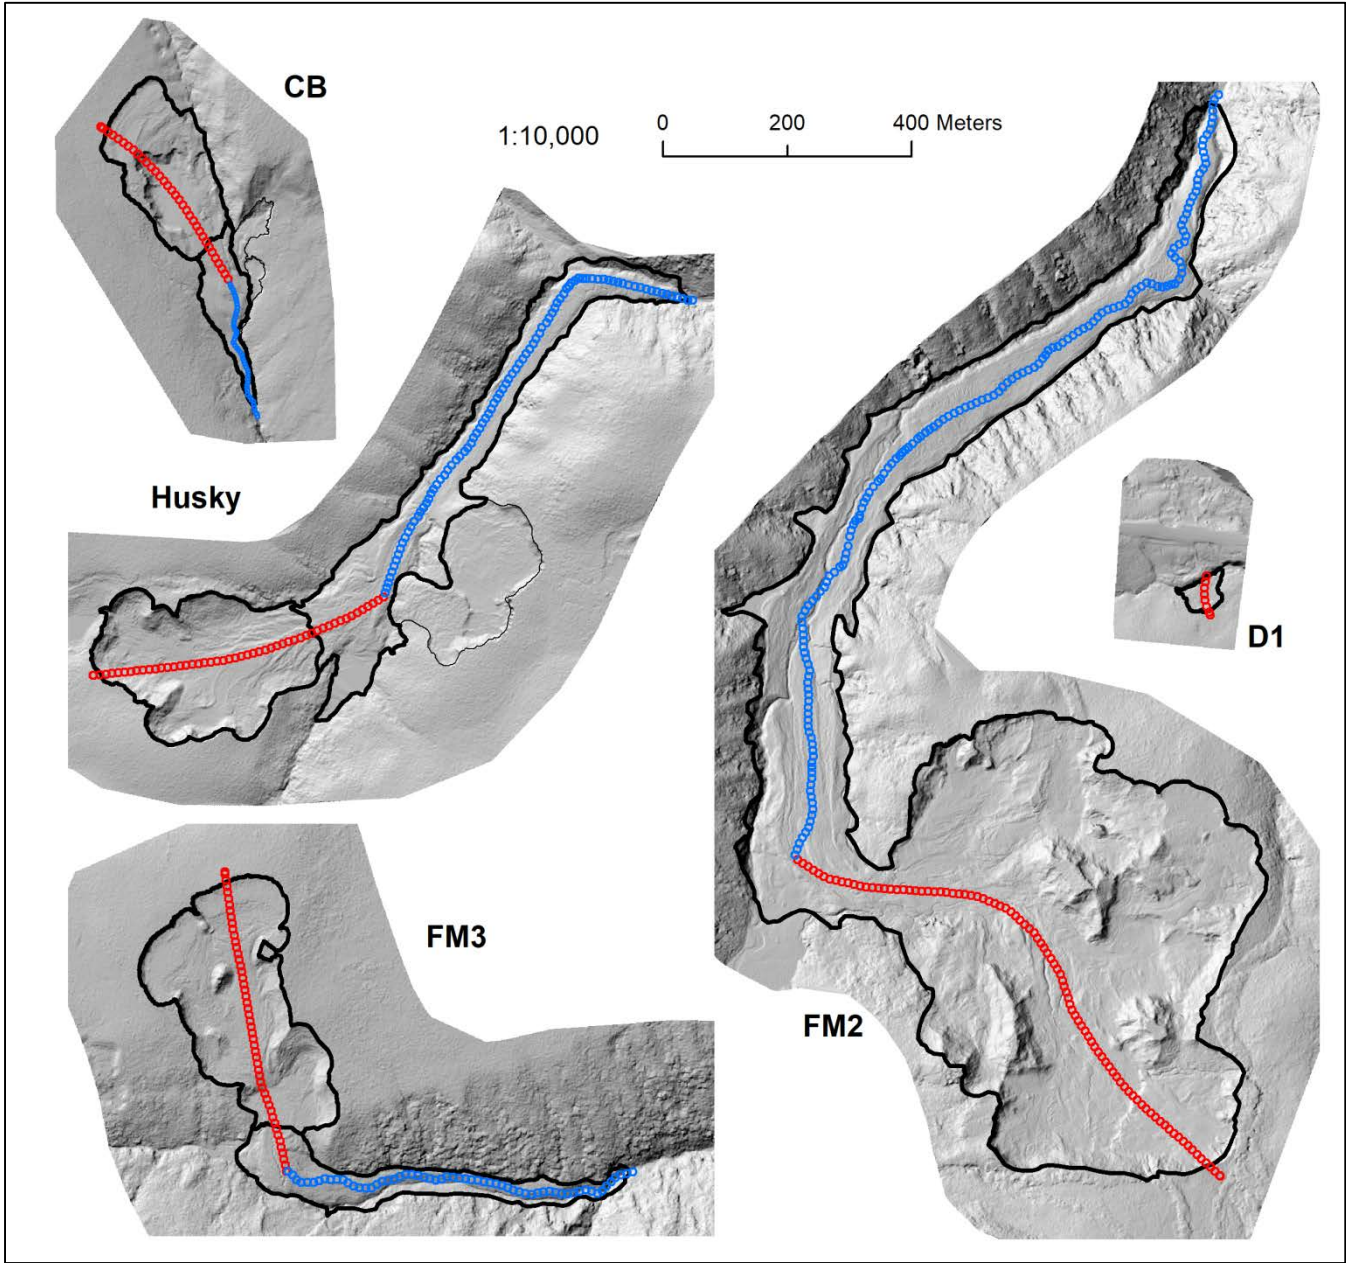

**Figure S1.** Transects through retrogressive thaw slump scar areas (red) and down-valley debris tongues (blue) that were used to construct topographic profiles in Figure 2g. Debris tongue transects follow the original stream channel. Secondary thaw slump scars are indicated by the thinner black line on CB and Husky. The terrain models are from UAV surveys described in Sect. 2.2, 2.3 and summarized in Table S2.

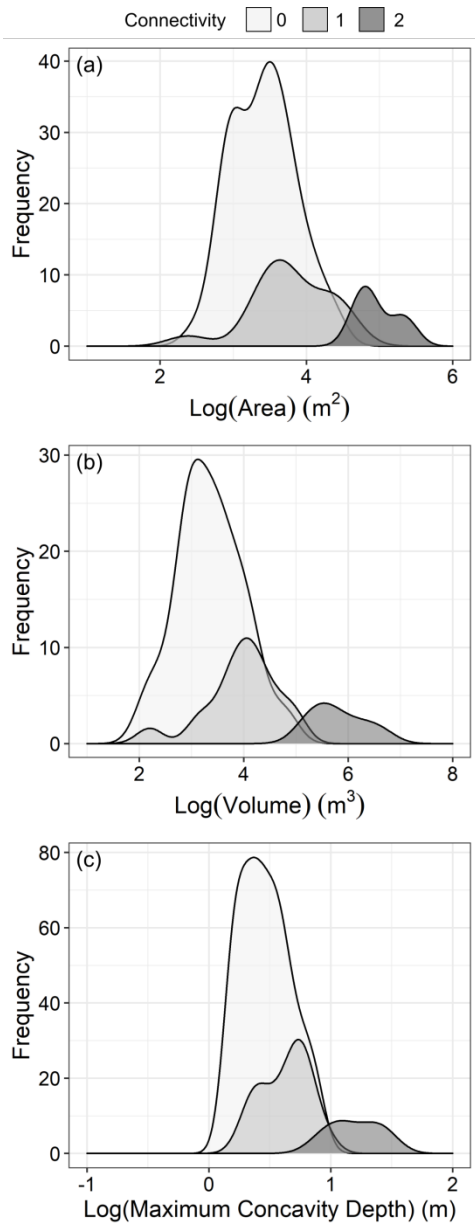

**Figure S2.** Frequency distributions for retrogressive thaw slump (a) area, (b) volume, and (c) maximum concavity depth grouped by downstream connectivity based on slump digitization using the 2011 lidar. Class “0” indicates no physical connection between the slump and downstream environment; “1” is a physical connection between an active or bare slump scar and the downstream environment; and “2” is evidence of downstream deposition, which is expressed as a debris tongue in a valley bottom, or a sediment lobe protruding into an adjacent lake or coastline.

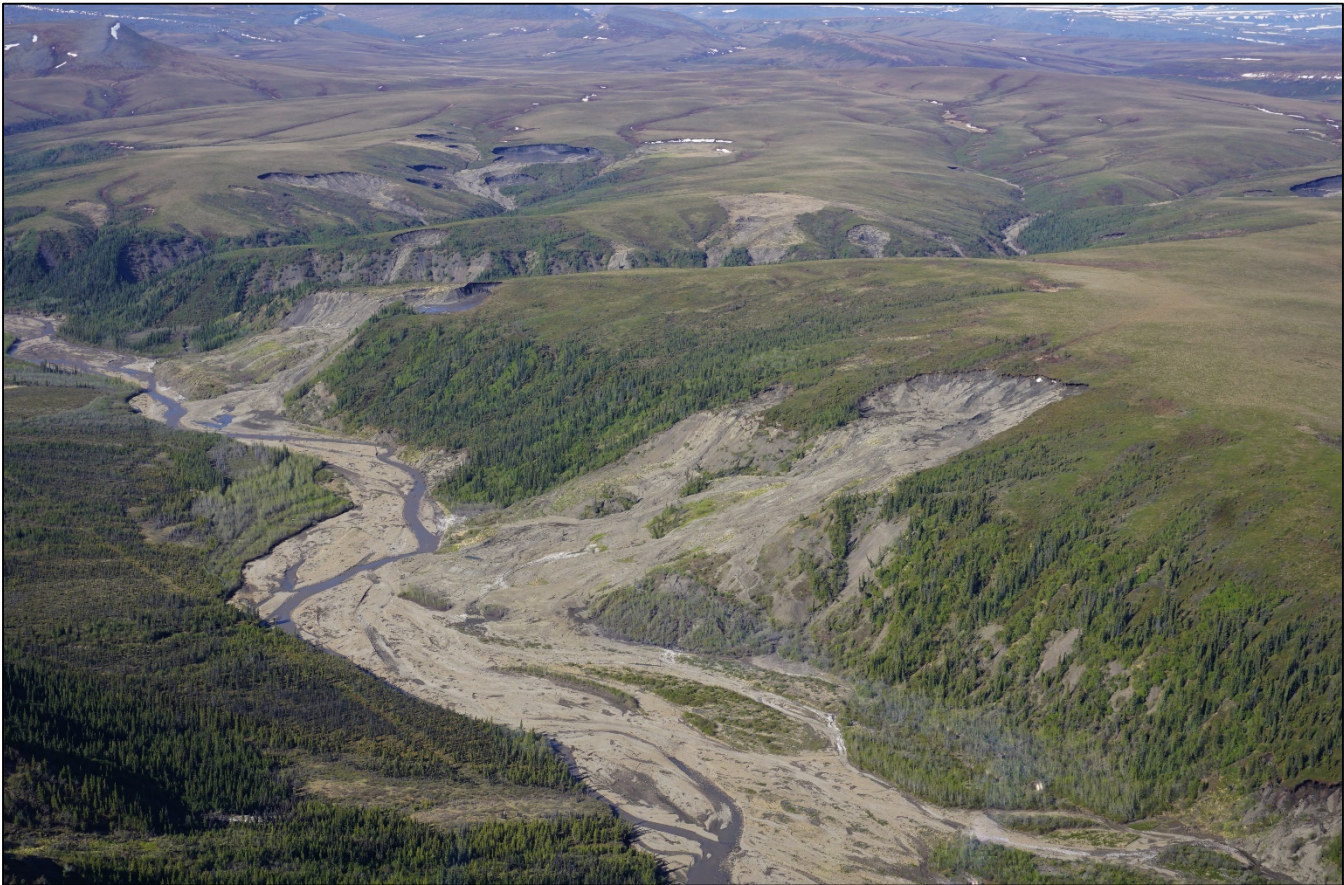

255 **Figure S3.** Willow River main stem view looking southwest, June 7, 2019. The photograph shows a small shallow landslide  
in the foreground right and large deep-seated translational failures that have evolved into retrogressive thaw slumps. Slide  
materials have run out onto the braided floodplain. Numerous retrogressive thaw slumps are visible in the background on  
slopes of incised tributary streams. The photograph is an upstream view towards inset (b) in Figure 6.

265 **Figure S4.** Panels show downstream effects of thaw-driven mass wasting and some oblique photographs of slope  
disturbances. Examples of thaw-driven increases in downstream sedimentation include i. Sachs River inflow to Fish Lake,  
Banks Island; ii. The inflow of Miner and Kugalik Rivers to Husky Lakes estuary, Mackenzie Delta region; iii. Development  
of massive, deep-seated translational failure on Johnson River, central Mackenzie Valley. Supporting oblique photographs of  
thaw-driven sediment sources are provided. Locations of i, ii, and iii are indicated in Figure 8.

270

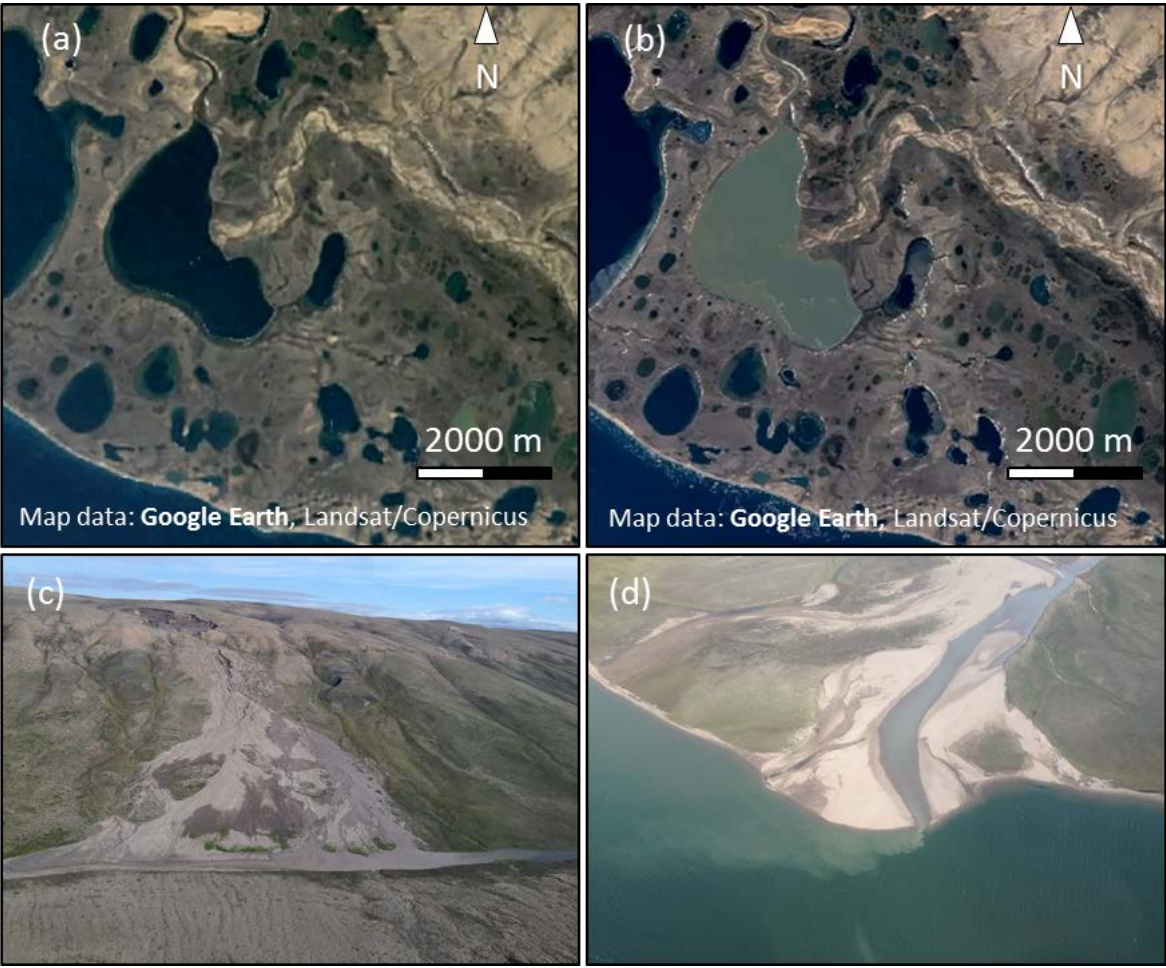

i. Sachs River and Fish Lake, Banks Island (a) 1985 and (b) 2018 (Lat/long: 71.8237 N, -124.4983 W). (c) August 1, 2015  
photograph of a large retrogressive thaw slump located on a Sachs River tributary about 35 km upstream of Fish Lake. (d)  
275 Sachs River inflow to Fish Lake during summer baseflow conditions (August 1, 2015) showing slump-derived turbidity.

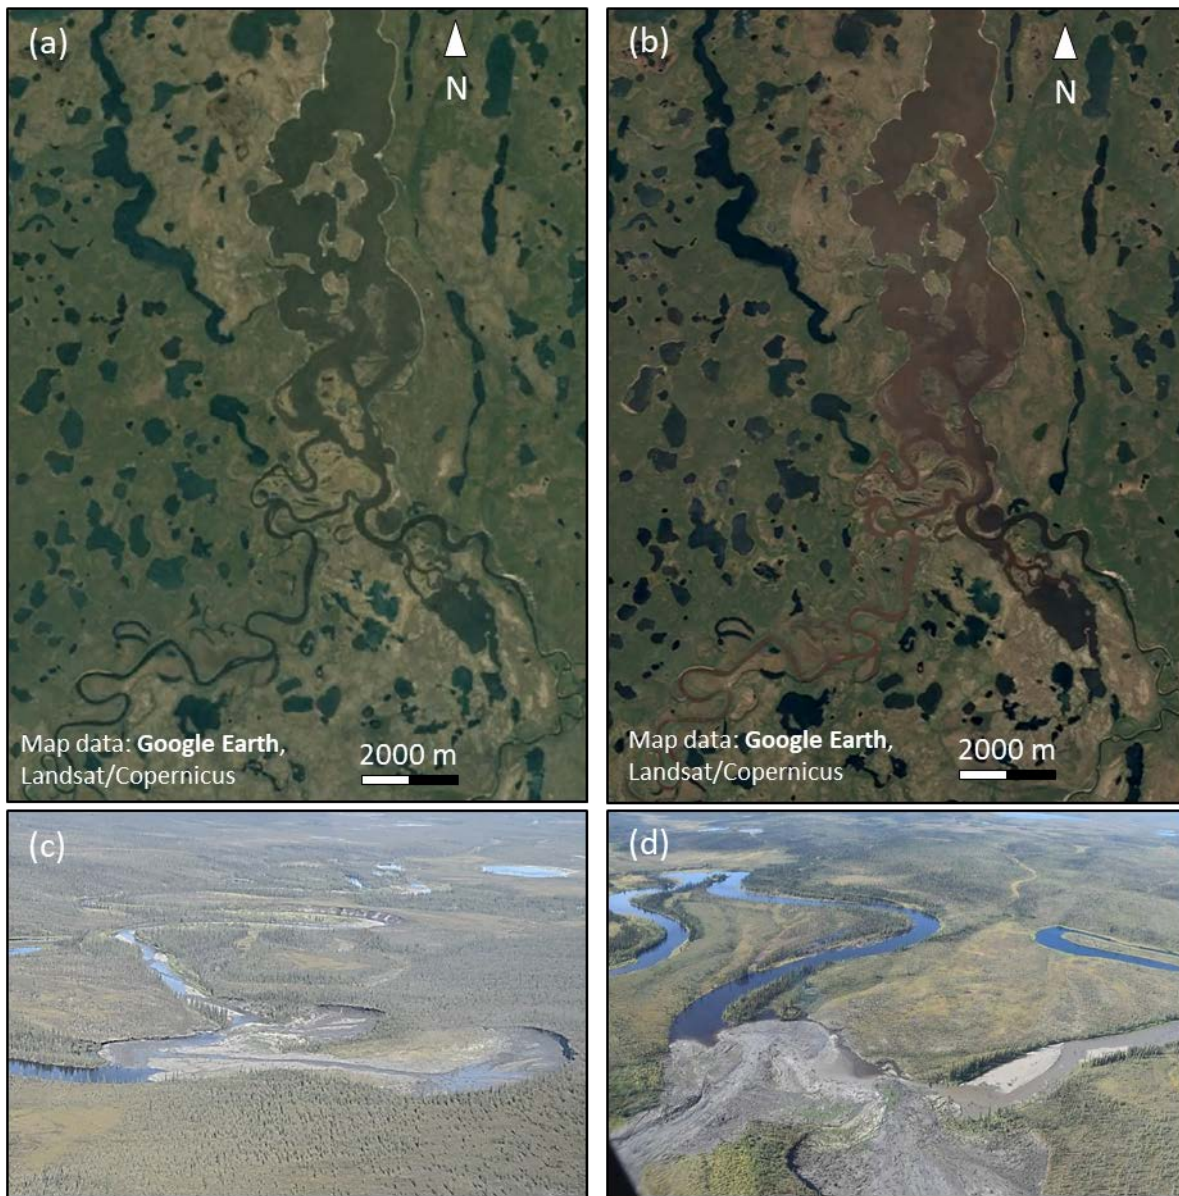

ii. Miner River (lower left) and Kugalik River (lower right) inflow to Husky Lake estuary (a) 1991 and (b) 2018. Note  
 280 turbidity of Miner River and estuary in 2018 (Lat/long: 69.1617 N, -131.0135 W). (c) Large retrogressive thaw slumps on  
 upper sections of Miner River and effects of thaw-driven slope to stream sediment delivery. (d) Dark, DOC-rich water of  
 undisturbed Miner River on left, and turbid conditions downstream (to the right) of the debris tongues which have blocked  
 the channel. Photographs are from summer 2020.

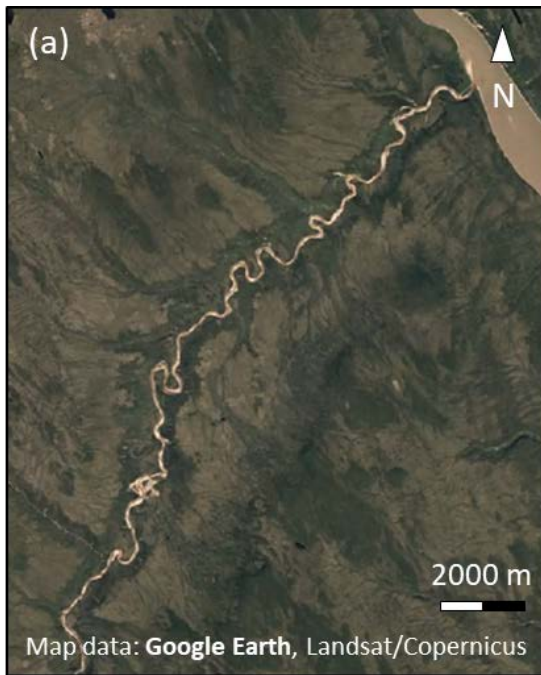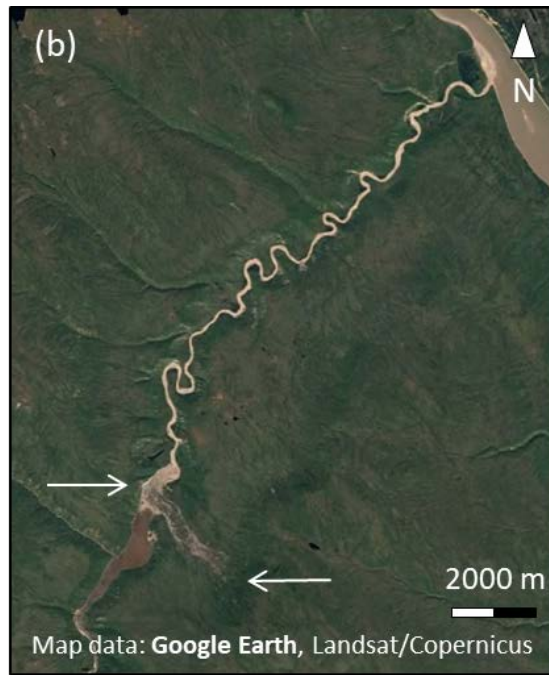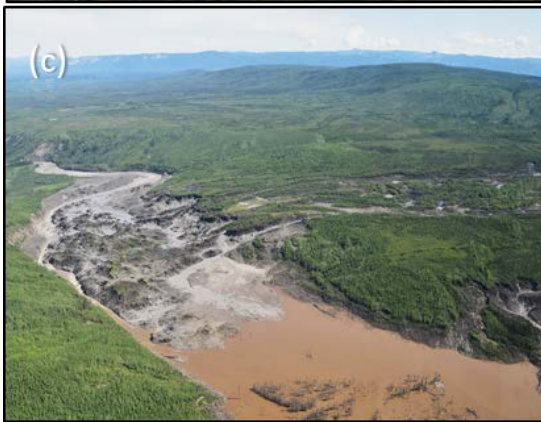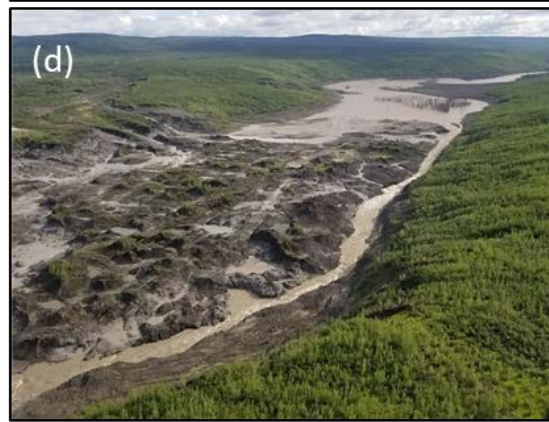

285 **iii.** Johnson River near the confluence with Mackenzie River showing changes caused by a major deep-seated translational failure that occurred in fall 2017. Images show the area in (a) 1991 and (b) following major slide development (2018) (Lat/long: 63.6587 N, -124.0530 W). Arrows on (b) are 2 km in length and show the upper part of the slide and the debris deposit. Note the high turbidity of the river downstream of the landslide and the development of an alluvial deposit at the
   
 290 Johnson River confluence with the Mackenzie River in the upper right. (c, d) East and southward oblique views, respectively, from August 2020 showing the enormous debris flow deposit that has infilled the Johnson River valley. The fine-grained, ice-rich permafrost materials that have been translocated into the valley are melting out, causing thermokarst and promoting mobilization of materials and their transport by Johnson River. For scale, note forest cover on the blocks of permafrost debris that moved down a 3-5° slope into the valley. Blockage of the Johnson River caused an upstream lake to
   
 295 form, and the river has incised a canyon through the debris deposit.

Tables S1-S5

**Table S1.** Summary of research goals, the spatial datasets and related methods sections, geographic locations, and sources of the datasets used in this multi-scale study.

| Research goals                                                                                                             | Base datasets                                                                              | Geographic locations<br>(Figure 1)                         | Data source                                                                          |
|----------------------------------------------------------------------------------------------------------------------------|--------------------------------------------------------------------------------------------|------------------------------------------------------------|--------------------------------------------------------------------------------------|
| (A) Thaw-driven geomorphic change, allometry of retrogressive thaw slumps, and slope to stream connectivity                | <i>Sect. 2.2 &amp; 2.3</i> ; 2011 Lidar ( 1 m DEM)                                         | Peel Plateau; Anderson Plain & Tuk Coastlands              | NWT Centre for Geomatics, Gov. of Northwest Territories                              |
|                                                                                                                            | <i>Sect. 2.2 &amp; 2.3</i> ; UAV imagery ( $\leq 3$ cm, downsampled to 1 m DEM) (Table S2) | Peel Plateau                                               | van der Sluijs et al., 2018; NWT Centre for Geomatics, Gov. of Northwest Territories |
| (B) Medium-scale catchment effects of thaw-driven mass wasting                                                             | <i>Sect. 2.4</i> ; 2016-2017 Sentinel2 orthomosaic, 10m                                    | Peel Plateau; SE Banks Island                              | Rudy et al., 2020                                                                    |
|                                                                                                                            | <i>Sect. 2.4</i> ; 1986, 2002, 2018 Landsat, 30 m                                          | Willow River                                               | Rudy and Kokelj, 2020 (for thaw slumps)                                              |
|                                                                                                                            | <i>Sect. 2.4</i> ; Stream sediment and discharge data, Peel watershed                      | Peel Plateau                                               | Shakil et al., 2020b                                                                 |
| (C) Distribution of mass-wasting effects on fluvial networks and propagation across Arctic drainage of northwestern Canada | <i>Sect. 2.5</i> ; SPOT 4/5 (2004-2010), 15m; Sentinel-2 (2016, 2017), 10m                 | Arctic drainage from permafrost terrain NW Canada & Banks, | Kokoszka and Kokelj, 2021                                                            |
|                                                                                                                            | <i>Sect. 2.5</i> ; National Hydro Network dataset                                          | Amundsen, Peel, Keele-Redstone watersheds                  | NRCan, 2016                                                                          |

**Table S2.** Summary of UAV surveys of retrogressive thaw slumps conducted over the four-year campaign to support Sect. 3.1-3.3 (modified from Van der Sluijs et al., 2018).

| Site                                      | Date          | UAV     | Res<br>(cm) | Area<br>(ha) | Photos<br>(no.) |
|-------------------------------------------|---------------|---------|-------------|--------------|-----------------|
| <b>D1</b><br>(67.1771° N -135.7555° W)    | 2015-07-28    | PX8     | 1.5         | 4.3          | 295             |
|                                           | 2015-07-29    | PX8     | 1.5         | 3.8          | 291             |
|                                           | 2016-08-03    | Inspire | 1.3         | 1.7          | 79              |
|                                           | 2017-07-27    | P4P     | 1.2         | 6.3          | 316             |
|                                           | 2018-09-18    | eBee    | 1.5         | 9.0          | 311             |
| <b>FM3</b><br>(67.2539° N -135.2732° W)   | 2015-07-29    | PX8     | 1.9         | 28.3         | 658             |
|                                           | 2016-08-02    | Inspire | 2.4         | 34.3         | 583             |
|                                           | 2017-07-26/28 | eBee    | 3.3         | 365.0        | 3,499           |
|                                           | 2018-09-19    | eBee    | 3.3         | 88           | 463             |
| <b>FM2</b><br>(67.2545° N -135.2286° W)   | 2016-08-02    | Inspire | 2.4         | 83.6         | 1516            |
|                                           | 2017-07-26/28 | eBee    | 3.3         | 365.0        | 3499            |
|                                           | 2018-09-18    | eBee    | 3.3         | 161          | 982             |
| <b>Husky</b><br>(67.5207 ° N -135.3005 W) | 2016-08-03    | Inspire | 1.7         | 36.8         | 773             |
|                                           | 2017-07-28    | eBee    | 3.4         | 100.5        | 723             |
|                                           | 2018-09-19    | eBee    | 3.2         | 90.0         | 510             |
| <b>CB</b><br>(67.1814° N -135.7295° W)    | 2015-07-28    | PX8     | 1.5         | 12.1         | 711             |
|                                           | 2018-09-18    | eBee    | 2.7         | 28.1         | 438             |
| Mean                                      |               |         | 2.3         | 83           | 920             |
| Stdev                                     |               |         | 0.8         | 115          | 1024            |
| Sum                                       |               |         |             | 1,053        | 15,647          |

Note: Flights conducted for thermal mapping, oblique still photography, and video purposes are not included. Table headings “Res” is resolution or pixel size. UAV platforms: Spyder PX8 Plus (PX8), Phantom 2 Vision Plus (P2), RX4-S Surveyor (RX4), Inspire 1 Pro (Inspire), eBee Plus RTK/PPK (eBee), and Phantom 4 Pro (P4P).

**Table S3** Summary statistics of area, volume, and mean and maximum scar concavity depth estimates for the sampled retrogressive thaw slump population (n = 71) in the Peel Plateau, and Anderson Plain and Tuktoyaktuk Coastlands 2011 lidar Corridors. Note that mean and maximum concavity depths were determined for each feature in the sample population.

|                |    | Area (m <sup>2</sup> ) | Volume (m <sup>3</sup> ) | Concavity depth (m) |         |
|----------------|----|------------------------|--------------------------|---------------------|---------|
|                |    |                        |                          | Mean                | Maximum |
| Mean           |    | 14,934                 | -106,003                 | -1.82               | -4.76   |
| Median         |    | 3,323                  | -3,860                   | -1.18               | -3.36   |
| Std. Deviation |    | 38,056                 | 480,480                  | 2.27                | 4.73    |
| Skewness       |    | 5                      | -6                       | -3.62               | -3.34   |
| Kurtosis       |    | 26                     | 45                       | 15.46               | 12.85   |
| Minimum        |    | 242                    | -3,653,390               | -14.39              | -28.37  |
| Maximum        |    | 253,937                | -128                     | -0.11               | -1.48   |
| Sum            |    | 1,060,280              | -7,526,216               |                     |         |
| Percentiles    | 25 | 1,495                  | -13,982                  | -2.10               | -5.47   |
|                | 50 | 3,323                  | -3,860                   | -1.18               | -3.36   |
|                | 75 | 7,730                  | -995                     | -0.70               | -2.22   |

325

330

335

340

**Table S4.** Summary statistics for size metrics of active retrogressive thaw slumps in the Willow River catchment for 1986, 2002, and 2018. Area estimates were determined by digitizing orthorectified, color-balanced, cloud-free Landsat imagery (Rudy and Kokelj, 2020). Slump volume and maximum concavity depth were estimated using relationships shown in Figure

| Parameter                                 | 1986            | 2002            | 2018             |
|-------------------------------------------|-----------------|-----------------|------------------|
| <b>Scar area (m<sup>2</sup>)</b>          |                 |                 |                  |
| Count                                     | 21              | 73              | 198              |
| Cumulative area                           | 105,081         | 669,249         | 3,545,445        |
| Median                                    | 4,512           | 5,688           | 8,293            |
| Mean (STdev)                              | 5,004 (2,601)   | 9,768 (10,608)  | 17,906 (29,685)  |
| Max                                       | 13,497          | 63,838          | 198,986          |
| Min                                       | 1,649           | 766             | 1,073            |
| <b>Scar volume (m<sup>3</sup>)</b>        |                 |                 |                  |
| Cumulative volume                         | 144,868         | 1,437,340       | 11,688,197       |
| Median                                    | 5,537           | 7,687           | 13,119           |
| Mean (STdev)                              | 6,898 (5,513)   | 19,690 (35,515) | 59,031 (161,741) |
| Max                                       | 26,154          | 236,479         | 1,184,216        |
| Min                                       | 1,330           | 449             | 723              |
| <b>Concavity depth (m)</b>                |                 |                 |                  |
| Median                                    | 3.6             | 3.9             | 4.5              |
| Mean (STdev)                              | 3.6 (0.67)      | 4.1 (1.5)       | 5.1 (2.1)        |
| Max                                       | 5.3             | 9.3             | 14.1             |
| Min                                       | 2.5             | 1.9             | 2.1              |
| <b>Debris tongue area (m<sup>2</sup>)</b> |                 |                 |                  |
| Count                                     | 6               | 31              | 67               |
| Median                                    | 5,046           | 6,165           | 8,884            |
| Mean (STdev)                              | 18,655 (24,511) | 9,681 (10,071)  | 15,394 (18,857)  |
| Max                                       | 59,011          | 39,682          | 100,569          |
| Min                                       | 1,631           | 1,250           | 1,087            |

Note: Landsat dates: 1986-07-07; 2002-07-20; 2018-07-22

350

355

360

365

370

375

380

385

**Table S5.** Results Dunn’s post-hoc test for comparison of retrogressive thaw slump scar area between 1986, 2002, and 2018 following a Kruskal-Wallis Rank Sum test ( $p > 0.00001$ ).

| Comparison dates | Z score | P. unadjusted | P. adjusted |
|------------------|---------|---------------|-------------|
| 2002-2018        | -3.4614 | 0.0005        | 0.0008      |
| 1986-2002        | 1.4714  | 0.1411        | 0.1411      |
| 1986-2018        | 3.6529  | 0.0002        | 0.0008      |

Note: Dunn’s post-hoc results indicate significant differences between 1986 and 2018, and 2002 and 2018.

390

## Videos S1-S3

### Video S1.

395 Video shows truncation of a small tundra lake by thaw slump enlargement causing rapid drainage on the Peel Plateau in 2015 (67.5207 ° N -135.3005° W).

<https://www.nwtgeoscience.ca/services/permafrost-thaw-slumps/video-permafrost-thaw-causes-lake-drainage-peel-plateau-nwt>. (last access: 4 April, 2021).

### 400 Video S2.

UAV fly-through of a large active retrogressive thaw slump in the Willow River catchment is shown in Figure 6b (68.1119° N -135.6806° W).

<https://www.nwtgeoscience.ca/services/permafrost-thaw-slumps/drone-survey-permafrost-mega-slump-willow-river-nwt> (last access: 4 April, 2021).

405

### Video S3.

Animated GIF image depicting a Landsat time-series animation covering the 1985-2019 period for lower Willow River catchment on the eastern edge of the Mackenzie Delta showing the evolution of major retrogressive thaw slumps most notably in the lower-left corner of imagery (see Fig. 6b). The time series shows the acceleration of disturbance activity in the late 1990s and early 2000s, alluviation of the Willow River Channel, and infilling of the large Mackenzie Delta lake from 2007 and 2019 with sediment derived from thaw-driven landslides and transported by the Willow River (Fig. 6c). The animation was generated using two ©Google Earth Engine applications: 1) the “LandTrendr time-series animation app, URL: <https://emaprlab.users.earthengine.app/view/lt-gee-time-series-animator>” to generate the animation, and 2) the “Snazzy EE-TS-GIF, URL: <https://jstnbraaten.shinyapps.io/snazzy-ee-ts-gif/>” for annotations. The Landsat time series have been smoothed by LandTrendr spectral-temporal segmentation on ©Google Earth Engine (Kennedy et al., 2018). URL: <https://emapr.github.io/LT-GEE/ui-applications.html>. (last access: 3 August, 2020).

420

425

430

## References

- 435 Hornby, D. D.: RivEX (Version 10.25) [Software], available from <http://www.rivex.co.uk> (last access: 28 April, 2021),  
2017.
- Kennedy, R. E., Yang, Z., Gorelick, N., Braaten, J., Cavalcante, L., Cohen, W. B., and Healey, S.: Implementation of the  
LandTrendr Algorithm on Google Earth Engine, Remote Sens., 10, 691, <https://doi.org/10.3390/rs10050691>, (last access: 3  
440 August, 2020), 2018.
- Kokoszka, J. and Kokelj, S. V.: Broad-scale mapping of hydrological features affected by slope-thermokarst from Arctic  
drainage, northwestern Canada: Methods and Data, Northwest Territories Geological Survey, Yellowknife, NT, Canada,  
NWT Open Report, 2020-013, 9 pp., appendices, and digital data, <https://doi.org/10.46887/2020-013>, 2021.
- 445 Natural Resources Canada.: National Hydro Network – NHN – GeoBase Series [dataset], Ottawa, ON, Canada, Natural  
Resources Canada, <https://open.canada.ca/data/en/dataset/a4b190fe-e090-4e6d-881e-b87956c07977>, 2016.
- Natural Resources Canada.: Canada digital elevation data [dataset]. Ottawa, ON, Canada, Natural Resources Canada,  
450 <https://open.canada.ca/data/en/dataset/7f245e4d-76c2-4caa-951a-45d1d2051333>, 2015.
- Rudy, A. C. A. and Kokelj, S. V.: Inventory of retrogressive thaw slumps in the Willow River watershed, mapped using  
1986, 2002, and 2018 Landsat imagery, Northwest Territories Geological Survey, Yellowknife, NT, Canada, NWT Open  
Report 2020-011, 4 pp. and digital data, <https://doi.org/10.46887/2020-011>, 2020.
- 455 Rudy, A. C. A., Kokelj, S. V., and Kokoszka, J.: Inventory of retrogressive thaw slumps on the Peel Plateau and on  
southeastern Banks Island, Northwest Territories using 2017 Sentinel imagery, Northwest Territories Geological Survey,  
Yellowknife, NT, Canada, NWT Open Report 2020-012, 5 pp. and digital data, <https://doi.org/10.46887/2020-012>, 2020.

460
