# Supplementary material for: Thaw-driven mass wasting couples slopes with downstream systems, and effects propagate through Arctic drainage networks
Source: Copernicus journal article supplement (doi:10.5194/tc-15-3059-2021), 2021-07-06
Supplement: Supplementary file 1 [file tc-15-3059-2021-supplement.zip › tc-15-3059-2021-supplement-title-page.pdf]

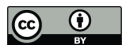

*Supplement of*

**Thaw-driven mass wasting couples slopes with downstream systems, and effects propagate through Arctic drainage networks**

**Steven V. Kokelj et al.**

*Correspondence to:* Steven V. Kokelj ([steve\\_kokelj@gov.nt.ca](mailto:steve_kokelj@gov.nt.ca))

- [tc-15-3059-2021-supplement-title-page.pdf](#)
- [Supplement.pdf](#)
- [VideoS3\\_tc-2020-218\\_25SEPT2020.gif](#)

The copyright of individual parts of the supplement might differ from the article licence.
